# Supplementary material
Source: ML conference proceedings conference paper supplement (https://proceedings.neurips.cc/paper_files/paper/2019/hash/2edfeadfe636973b42d7b6ac315b896c-Abstract.html)
Supplement: Supplementary file [file 2edfeadfe636973b42d7b6ac315b896c-Supplemental.zip]

## A Proof of Theorem 5

We begin by introducing a technical lemma.

**Lemma 7.** *Let  $a_i, b_i \in [0, 1]$  and  $|a_i - b_i| \leq \Delta_i$  for  $i \in [k]$ . Then we can show*

$$\sum_{x \in \{0,1\}^k} \left| \prod_i a_i^{x_i} (1 - a_i)^{1-x_i} - \prod_i b_i^{x_i} (1 - b_i)^{1-x_i} \right| \leq 2 \sum_{j=1}^k \Delta_j. \quad (6)$$

*Proof.* Fix a binary vector  $x$ . For simplicity, let  $c_i = a_i^{x_i} (1 - a_i)^{1-x_i}$  and  $d_i = b_i^{x_i} (1 - b_i)^{1-x_i}$ . Since  $x_i$  is either 0 or 1, we have  $|c_i - d_i| = |a_i - b_i| \leq \Delta_i$ . Then we can deduce

$$\begin{aligned} \left| \prod_{i=1}^k c_i - \prod_{i=1}^k d_i \right| &\leq \left( \prod_{i=1}^{k-1} c_i \right) |c_k - d_k| + \left| \prod_{i=1}^{k-1} c_i - \prod_{i=1}^{k-1} d_i \right| d_k \\ &\leq \left( \prod_{i=1}^{k-1} c_i \right) \Delta_k + \left| \prod_{i=1}^{k-1} c_i - \prod_{i=1}^{k-1} d_i \right| d_k \\ &\leq \left( \prod_{i=1}^{k-1} c_i \right) \Delta_k + \left( \prod_{i=1}^{k-2} c_i \right) \Delta_{k-1} d_k + \left| \prod_{i=1}^{k-2} c_i - \prod_{i=1}^{k-2} d_i \right| d_{k-1} d_k \\ &\leq \dots \\ &\leq \sum_{j=1}^k \left( \prod_{i=1}^{j-1} c_i \right) \Delta_j \left( \prod_{i=j+1}^k d_i \right). \end{aligned}$$

When summing up for all binary vectors  $x$ , we can write the coefficient of  $\Delta_j$  as

$$\begin{aligned} \sum_{x \in \{0,1\}^k} \left( \prod_{i=1}^{j-1} c_i \right) \left( \prod_{i=j+1}^k d_i \right) &= \left( \prod_{i=1}^{j-1} \sum_{x_i \in \{0,1\}} c_i \right) \left( \sum_{x_j \in \{0,1\}} 1 \right) \left( \prod_{i=j+1}^k \sum_{x_i \in \{0,1\}} d_i \right) \\ &= \left( \prod_{i=1}^{j-1} 1 \right) 2 \left( \prod_{i=j+1}^k 1 \right) \\ &= 2, \end{aligned}$$

where the second equality holds because  $\sum_{x \in \{0,1\}} a^x (1-a)^{1-x} = a + (1-a) = 1$ . This completes the proof.  $\square$

Now we prove the main theorem.

**Theorem 5. (Bayesian regret bound of Thompson sampling)** *The Bayesian regret of Algorithm 1 satisfies the following bound*

$$BR(T) = \mathcal{O}(\sqrt{KL^3 N^3 T \log T}) = \mathcal{O}(\sqrt{mKL^4 N^3 \log(mL)}).$$

*Proof.* We fix an episode  $l$  and analyze the regret in this episode. Let  $t_l = (l-1)L$  so that the episode starts at time  $t_l + 1$ . Define

$$N_l(k, r, n) = \sum_{t=1}^{t_l} \mathbb{1}\{A_{t,k} = 1, r_k = r, n_k = n\}.$$

It counts the number of rounds where the arm  $k$  was chosen by the learner with history  $r_k = r$  and  $n_k = n$  (see (3) for definition). Note that

$$k \in [K], r \in \{0, 1, \rho(k)\}, \text{ and } n \in [L],$$

where  $\rho(k)$  is the initial success rate of the arm  $k$ . This implies there are  $3KL$  tuples of  $(k, r, n)$ .

Let  $\omega^\theta(k, r, n)$  denote the conditional probability of  $X_k = 1$  given a history  $(r, n)$  and a system parameter  $\theta$ . Also let  $\hat{\omega}(k, r, n)$  denote the empirical mean of this quantity (using  $N_l(k, r, n)$  past observations and set the estimate to 0 if  $N_l(k, r, n) = 0$ ). Then define

$$\Theta_l = \{\theta \mid \forall(k, r, n), \quad |(\hat{\omega} - \omega^\theta)(k, r, n)| < \sqrt{\frac{2 \log(1/\delta)}{1 \vee N_l(k, r, n)}}\}.$$

Since  $\hat{\omega}(k, r, n)$  is  $\mathcal{H}_{t_l}$ -measurable, so is the set  $\Theta_l$ . Using the Hoeffding inequality, one can show  $\mathbb{P}(\theta^* \notin \Theta_l) = \mathbb{P}(\theta_l \notin \Theta_l) \leq 3\delta KL$ .

We now turn our attention to the following Bellman operator

$$\mathcal{T}_{\pi_l}^\theta V_{\pi_l, t}^{\theta_l}(\mathcal{H}_{t-1}) = \mathbb{E}_{\theta, \pi_l}[A_{t_l+t} \cdot X_{t_l+t} + V_{\pi_l, t}^{\theta_l}(\mathcal{H}_t) | \mathcal{H}_{t-1}].$$

Since  $\pi_l$  is a deterministic policy,  $A_{t_l+t}$  is also deterministic given  $\mathcal{H}_{t-1}$  and  $\pi_l$ . Let  $(k_1, \dots, k_N)$  be the active arms at time  $t_l + t$  and write  $\omega^\theta(k_i, r_{k_i}, n_{k_i}) = \omega_{\theta, i}$ . Then we can rewrite

$$\mathcal{T}_{\pi_l}^\theta V_{\pi_l, t}^{\theta_l}(\mathcal{H}_{t-1}) = \sum_{i=1}^N \omega_{\theta, i} + \sum_{x \in \{0,1\}^N} P_x^\theta V_{\pi_l, t}^{\theta_l}(\mathcal{H}_{t-1} \cup (A_{t_l+t}, x)), \quad (7)$$

where  $P_x^\theta = \prod_{i=1}^N \omega_{\theta, i}^{x_i} (1 - \omega_{\theta, i})^{1-x_i}$ . Under the event that  $\theta^*, \theta_l \in \Theta_l$ , we have

$$|\omega_{\theta_l, i} - \omega_{\theta^*, i}| < 1 \wedge \sqrt{\frac{8 \log(1/\delta)}{1 \vee N_l(k_i, r_{k_i}, n_{k_i})}} =: \Delta_i(t_l + t), \quad (8)$$

where the dependence on  $t_l + t$  comes from the mapping from  $i$  to  $k_i$ . Lemma 7 provides

$$\sum_{x \in \{0,1\}^N} |P_x^{\theta_l} - P_x^{\theta^*}| \leq 2 \sum_{i=1}^N \Delta_i(t_l + t). \quad (9)$$

From (7), (9), and the fact that  $|V_{\pi_l, t}^\theta| \leq LN$ , we obtain given  $\mathcal{H}_{t-1}$  and the event  $\theta^*, \theta_l \in \Theta_l$ ,

$$|(\mathcal{T}_{\pi_l}^{\theta^*} - \mathcal{T}_{\pi_l}^{\theta_l}) V_{\pi_l, t}^{\theta_l}(\mathcal{H}_{t-1})| \leq (2LN + 1) \sum_{i=1}^N \Delta_i(t_l + t) \leq 3LN \sum_{i=1}^N \Delta_i(t_l + t).$$

Then by applying Lemma 4, we get

$$|V_{\pi_l, 1}^{\theta_l}(\emptyset) - V_{\pi_l, 1}^{\theta^*}(\emptyset)| \leq 3LN \mathbb{E}_{\theta^*, \pi_l} \sum_{t=1}^L \sum_{i=1}^N \Delta_i(t_l + t).$$

The above inequality holds whenever  $\theta^*, \theta_l \in \Theta_l$ . When  $\theta^* \notin \Theta_l$  or  $\theta_l \notin \Theta_l$ , which happens with probability less than  $6\delta KL$ , we have a trivial bound  $|V_{\pi_l, 1}^{\theta_l}(\emptyset) - V_{\pi_l, 1}^{\theta^*}(\emptyset)| \leq LN$ . We can deduce

$$|V_{\pi_l, 1}^{\theta_l}(\emptyset) - V_{\pi_l, 1}^{\theta^*}(\emptyset)| \leq 3LN \mathbb{1}(\theta^*, \theta_l \in \Theta_l) \mathbb{E}_{\theta^*, \pi_l} \sum_{t=1}^L \sum_{i=1}^N \Delta_i(t_l + t) + 6\delta KL^2 N.$$

Combining this with Lemma 3, we can show

$$BR(T) \leq 6\delta mKL^2 N + \mathbb{E}_{\theta^* \sim Q} 3LN \sum_{l=1}^m \mathbb{1}(\theta^*, \theta_l \in \Theta_l) \mathbb{E}_{\theta^*, \pi_l} \sum_{t=1}^L \sum_{i=1}^N \Delta_i(t_l + t). \quad (10)$$

We further analyze the summation to finish the argument. Note that for this summation, we have  $\theta^*, \theta_l \in \Theta_l$ . We shorten  $N_l(k_i, r_{k_i}, n_{k_i})$  to  $N_l$  for simplicity. By the definition of  $\Delta_i$  in (8), we get

$$\begin{aligned} \sum_{l=1}^m \sum_{t=1}^L \sum_{i=1}^N \Delta_i(t_l + t) &\leq \sum_{l=1}^m \sum_{t=1}^L \sum_{i=1}^N \mathbb{1}\{N_l \leq L\} + \Delta_i \mathbb{1}\{N_l > L\} \\ &\leq 6KL^2 + \sum_{l=1}^m \sum_{t=1}^L \sum_{i=1}^N \mathbb{1}\{N_l > L\} \sqrt{\frac{8 \log(1/\delta)}{N_l}}, \end{aligned} \quad (11)$$

where the second inequality holds because there are  $3KL$  possible tuples of  $(k, r, n)$  and a tuple can contribute at most  $2L$  to the first summation.

We can bound the second term as follows

$$\begin{aligned}
\sum_{l=1}^m \sum_{t=1}^L \sum_{i=1}^N \mathbb{1}\{N_l > L\} \sqrt{\frac{1}{N_l}} &= \sum_{l=1}^m \sum_{(k,r,n)} \mathbb{1}\{N_l > L\} (N_{l+1} - N_l) \sqrt{\frac{1}{N_l}} \\
&\leq \sum_{l=1}^m \sum_{(k,r,n)} (N_{l+1} - N_l) \sqrt{\frac{2}{N_{l+1}}} \\
&\leq \sqrt{8} \sum_{(k,r,n)} \sqrt{N_{m+1}(k, r, n)} \\
&\leq \sqrt{24KLNT}.
\end{aligned} \tag{12}$$

For the first inequality, we use  $N_{l+1} \leq N_l + L \leq 2N_l$ . The second inequality holds due to the integral trick. Finally, the last inequality holds by the Cauchy-Schwartz inequality along with the fact that  $\sum_{(k,r,n)} N_{m+1}(k, r, n) = NT$ .

Combining (10), (11), (12), and our assumption that  $T = mL$ , we obtain

$$BR(T) = \mathcal{O}(\delta KLNT + KL^3N + \sqrt{KL^3N^3T \log(1/\delta)}).$$

Since  $NT$  is a trivial upper bound of  $BR(T)$ , we may ignore the  $KL^3N$  term. Setting  $\delta = \frac{1}{T}$  completes the proof.  $\square$
